# Supplementary material for: Linear Diamides Derivative-Nucleated Biodegradable Poly(ethylene succinate) Polyester: Crystallization Kinetics and Aggregated Structure Manipulated by Hydrogen Bond Interaction
Source: Research Square preprint supplement (doi:10.21203/rs.3.rs-169317/v1), 2021-02-10
Supplement: Supplementary file 1 [file d88aff482e3c4c08d7962904.docx]

**Linear Diamides Derivative-Nucleated Biodegradable Poly(ethylene succinate) Polyester: Crystallization Kinetics and Aggregated Structure Manipulated by Hydrogen Bond Interaction**


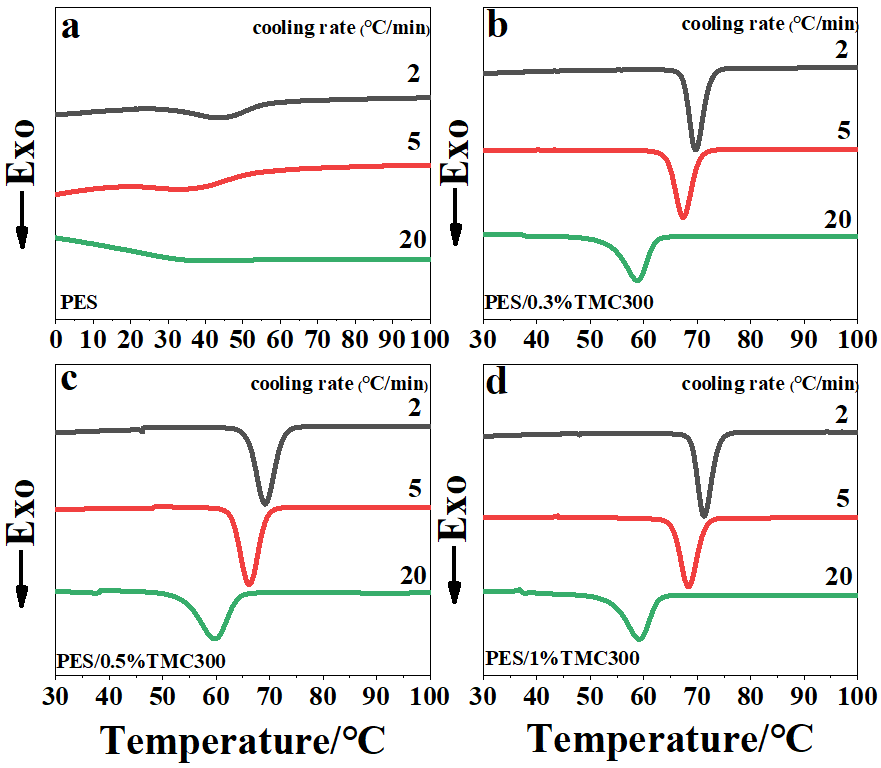


Fig. S1 Non-isothermal DSC curves at various rates for neat PES and PES/TMC300.

**Table S1** DSC data in non-isothermal cooling at various rates.

| Sample | 2 °C/min | |  | 5 °C/min | |  | 20 °C/min | |
| --- | --- | --- | --- | --- | --- | --- | --- | --- |
| *T*c (°C) | -∆*H*c (J/g) |  | *T*c (°C) | -∆*H*c (J/g) |  | *T*c (°C) | -∆*H*c (J/g) |
| PES | 43.5 | 26.9 |  | 32.5 | 18.2 |  | N.P. | — |
| PES/0.3%EBH | 69.7 | 49.5 |  | 67.4 | 48.1 |  | 58.8 | 45.1 |
| PES/0.5%EBH | 69.2 | 50.3 |  | 66.6 | 49.8 |  | 59.6 | 47.8 |
| PES/1%EBH | 71.4 | 51.9 |  | 68.4 | 50.3 |  | 59.2 | 48.7 |

N.P., no peak is discernible; —, no data are available.
